# Supplementary material for: Factors associated with HIV-1 resistance to integrase strand transfer inhibitors in Spain: Implications for dolutegravir-containing regimens
Source: PubMed Central journal article supplement (PMC9792149; doi:10.3389/fmicb.2022.1051096), 2022-12-12

**Supplementary Table 1.** Reagents and thermal profile for integrase amplification.

| Reagents                                         | RT-PCR<br>(for RNA) | 1 <sup>st</sup> PCR<br>(for DNA) | Nested PCR<br>(RNA and DNA) |
|--------------------------------------------------|---------------------|----------------------------------|-----------------------------|
| OneStep RT-PCR kit (QIAGEN) enzyme               | 1 $\mu$ l           | --                               | --                          |
| GoTaq G2 Hot Start colorless mastermix (Promega) | --                  | 12.5 $\mu$ l                     | --                          |
| BioTaq DNA polymerase (Bioline)                  | --                  | --                               | 0.75 U                      |
| RNasin (RNase inhibitor) (Promega)               | 5 U                 | --                               | -                           |
| MgCl <sub>2</sub>                                | 2.5 mM*             | 2 mM†                            | 1.8 mM                      |
| dNTPs                                            | 400 $\mu$ M         | 200 $\mu$ M†                     | 200 $\mu$ M                 |
| Each primer                                      | 0.6 $\mu$ M         | 0.4 $\mu$ M                      | 0.4 $\mu$ M                 |
| Reaction volume                                  | 25 $\mu$ l          | 25 $\mu$ l                       | 25 $\mu$ l                  |
| Thermal cycling profile                          |                     |                                  |                             |
| Reverse transcription                            | 30 min 50°C         | --                               | --                          |
| Hot start activation                             | 15 min 95°C         | --                               | --                          |
| Denaturation                                     | --                  | 2 min 94°C                       | 2 min 94°C                  |
| Cycling                                          | 40 cycles           | 35 cycles                        | 40 cycles                   |
| Denaturation                                     | 30 sec 94°C         | 30 sec 94°C                      | 30 sec 94°C                 |
| Annealing                                        | 1 min 55°C          | 45 sec 55°C                      | 45 sec 56°C                 |
| Extension                                        | 90 sec 72°C         | 1 min 72°C                       | 1 min 72°C                  |
| Final extension                                  | 7 min 72°C          | 7 min 72°C                       | 5 min 72°C                  |

\* Included in the 2x kit mastermix; † Included in the 5x kit buffer.

**Supplementary Table 2.** Primers used in the integrase amplification and sequencing.

| Oligo     | Use                    | Direction | HXB2 position | Sequence                                   |
|-----------|------------------------|-----------|---------------|--------------------------------------------|
| RTDS-N-S  | 1st PCR/RT-PCR         | sense     | 3132-3157     | 5'- ATA GGG CAG CAT AGA RCA AAA ATA GA     |
| 5'HIV-O-A | 1st PCR/RT-PCR         | antisense | 5239-5266     | 5'- CTC CTG TAT GCA GAC CCC AAT ATG TTG T  |
| INTS      | nested PCR/ sequencing | sense     | 4160-4182     | 5'- AGC ACA CAA AGG AAT TGG AGG AA         |
| 5'HIVNA   | nested PCR/ sequencing | antisense | 5192-5220     | 5'- CCC TAG TGG GAT GTG TAC TTC TGA ACT TA |
| IN-MED-S  | sequencing             | sense     | 4647-4671     | 5'- GGC ATT CCC TAC AAT CCC CAA AGT C      |
| B2-A-N    | sequencing             | antisense | 5043-5067     | 5'- AAT CAT CAC CTG CCA TCT GTT TTC C      |

**Supplementary Table 3.** Codon usage and resistance cost of INSTI resistance mutations in subtype B and non-B subtype strains.

| Position    | Codon         | Subtype B (N=2016) |      | Non-subtype B (N=680) |      | Resistance mutations |         |       |
|-------------|---------------|--------------------|------|-----------------------|------|----------------------|---------|-------|
|             |               | N                  | %    | N                     | %    | AA*                  | Codon†  | SC‡   |
| <b>E92</b>  | <b>GAA</b>    | 591                | 29   | 624                   | 92   | Q                    | CAA     | 5.8   |
|             | <b>GAG</b>    | 1281               | 64   | 39                    | 5.7  | Q                    | CAG     | 5.8   |
|             | <b>GAN</b>    | 137                | 6.8  | 7                     | 1.0  |                      |         |       |
|             | <b>Others</b> | 7                  | 0.3  | 10                    | 1.5  |                      |         |       |
| <b>T97</b>  | <b>ACA</b>    | 1928               | 96   | 647                   | 95   | A                    | GCA     | 1     |
|             | <b>ACT</b>    | 7                  | 0.35 | 3                     | 0.44 | A                    | GCT     | 1     |
|             | <b>ACC</b>    | 8                  | 0.40 |                       |      | A                    | GCC     | 1     |
|             | <b>ACG</b>    | 10                 | 0.50 |                       |      | A                    | GCG     | 1     |
|             | <b>ACN</b>    | 14                 | 0.69 | 7                     | 1.0  |                      |         |       |
|             | <b>Others</b> | 49                 | 2.4  | 23                    | 3.4  |                      |         |       |
| <b>G118</b> | <b>GGA</b>    | 24                 | 1.2  | 11                    | 1.6  | R                    | AGA     | 1     |
|             | <b>GGT</b>    | 136                | 6.7  | 86                    | 13   | R                    | CGT     | 5.8   |
|             | <b>GGC</b>    | 1784               | 88   | 563                   | 83   | R                    | AGG     | 4.4   |
|             | <b>GGG</b>    | 7                  | 0.35 | 1                     | 0.15 | R                    | AGG     | 1     |
|             | <b>GGN</b>    | 62                 | 3.1  | 19                    | 2.8  |                      |         |       |
|             | <b>Others</b> | 3                  | 0.15 |                       |      |                      |         |       |
| <b>E138</b> | <b>GAA</b>    | 1935               | 96   | 646                   | 95   | K                    | AAA     | 1     |
|             | <b>GAG</b>    | 38                 | 1.9  | 17                    | 2.5  | K                    | AAG     | 1     |
|             | <b>GAN</b>    | 16                 | 0.79 | 9                     | 1.3  |                      |         |       |
|             | <b>otros</b>  | 27                 | 1.3  | 8                     | 1.2  |                      |         |       |
| <b>G140</b> | <b>GGA</b>    | 72                 | 3.6  | 501                   | 74   | S                    | AGC     | 7.4   |
|             | <b>GGT</b>    | 321                | 16   | 11                    | 1.6  | S                    | AGT     | 1     |
|             | <b>GGC</b>    | 1454               | 72   | 53                    | 7.8  | S                    | AGC     | 1     |
|             | <b>GGG</b>    | 30                 | 1.5  | 94                    | 14   | S                    | AGC     | 3.9   |
|             | <b>GGN</b>    | 97                 | 4.8  | 18                    | 2.6  |                      |         |       |
|             | <b>Others</b> | 42                 | 2.1  | 3                     | 0.44 |                      |         |       |
| <b>Q148</b> | <b>CAA</b>    | 1870               | 93   | 601                   | 88   | H/R                  | CAC/CGA | 1.8/1 |
|             | <b>CAG</b>    | 81                 | 4.0  | 71                    | 10   | H/R                  | CAC/CGG | 5.8/1 |
|             | <b>CAN</b>    | 47                 | 2.3  | 4                     | 0.59 |                      |         |       |
|             | <b>Others</b> | 18                 | 0.9  | 4                     | 0.59 |                      |         |       |
| <b>N155</b> | <b>AAT</b>    | 1848               | 92   | 647                   | 95   | H                    | CAT     | 1.8   |
|             | <b>AAC</b>    | 79                 | 3.9  | 11                    | 1.6  | H                    | CAC     | 1.8   |
|             | <b>AAN</b>    | 38                 | 1.9  | 7                     | 1.0  |                      |         |       |
|             | <b>Others</b> | 51                 | 2.5  | 15                    | 2.2  |                      |         |       |
| <b>G163</b> | <b>GGA</b>    | 1611               | 80   | 321                   | 47   | R                    | AGA     | 1     |
|             | <b>GGT</b>    | 10                 | 0    | 2                     | 0.29 | R                    | CGT     | 5.8   |
|             | <b>GGC</b>    | 9                  | 0    | 2                     | 0.29 | R                    | CGC     | 5.8   |
|             | <b>GGG</b>    | 163                | 8.1  | 282                   | 41   | R                    | AGG     | 1     |
|             | <b>GGN</b>    | 69                 | 3.4  | 20                    | 2.9  |                      |         |       |
|             | <b>Others</b> | 154                | 7.6  | 53                    | 7.8  |                      |         |       |
| <b>D232</b> | <b>GAT</b>    | 1577               | 78   | 150                   | 22   | N                    | AAT     | 1     |
|             | <b>GAC</b>    | 213                | 11   | 495                   | 73   | N                    | AAC     | 1     |
|             | <b>Others</b> | 226                | 11   | 36                    | 5.3  |                      |         |       |
| <b>R263</b> | <b>AGA</b>    | 1810               | 90   | 586                   | 86   | K                    | AAA     | 1     |
|             | <b>AGG</b>    | 142                | 7.0  | 72                    | 11   | K                    | AAG     | 1     |
|             | <b>AGN</b>    | 54                 | 2.7  | 16                    | 2.4  |                      |         |       |
|             | <b>Others</b> | 10                 | 0.50 | 6                     | 0.88 |                      |         |       |

\*AA: Amino acid change which INSTI resistance. † Triplet with the lowest substitution cost according to Theys et al. 2019. ‡SC: Substitution cost (score defined for each triplet according to Theys et al. 2019).

**Supplementary Figure 1.** Frequency of INSTI-resistance mutations in subtype B and non-B subtype infections. Only mutations with statistically significant differences are shown.

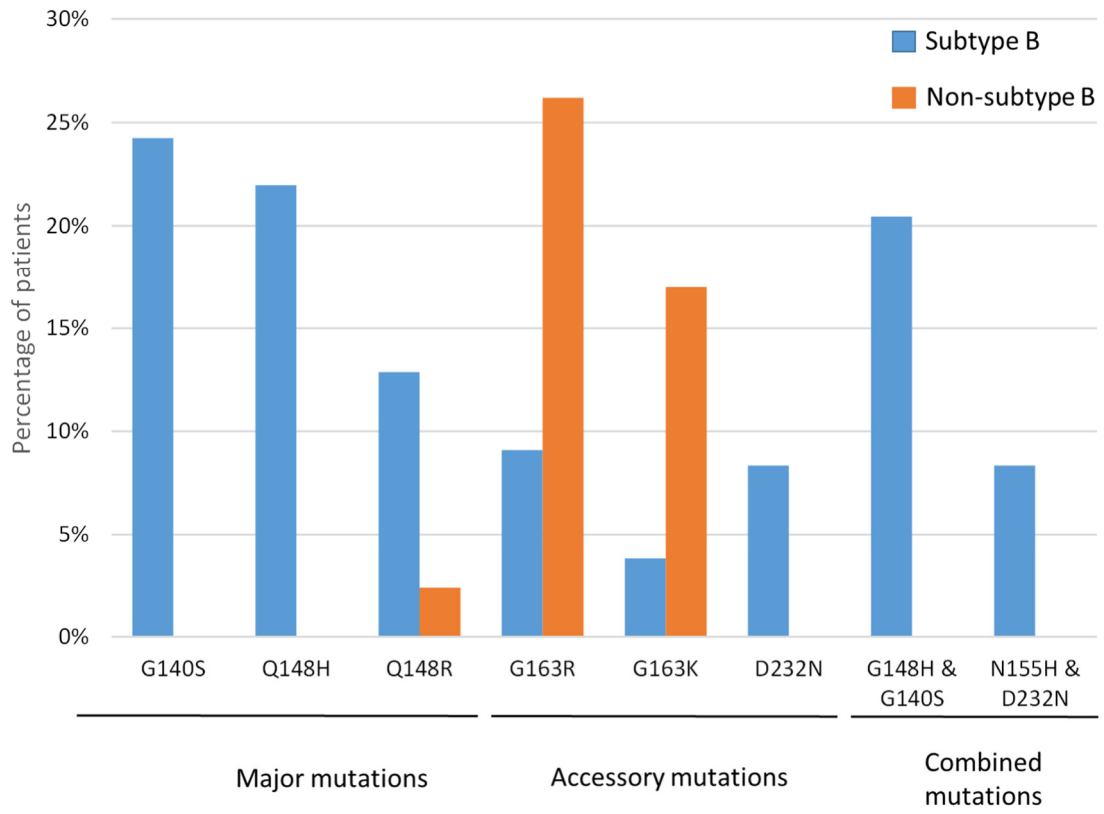

Supplement: Presentation_1.pdf [file Presentation_1.pdf]
